1 **Title:** Global and Local Head Direction Coding in the Human Brain

2

3 **Authors:** Shine, J. P.<sup>1,2</sup> and Wolbers, T.<sup>1,3</sup>

4

5 **Affiliations:**

6 1. German Center for Neurodegenerative Diseases (DZNE), Aging and Cognition Research  
7 Group, 39120 Magdeburg, Germany

8 2. Medical Faculty, Otto von Guericke University, 39120 Magdeburg, Germany

9 3. Center for Behavioral Brain Sciences, 39118 Magdeburg, Germany

10

11 **Abbreviated title:** Global and Local Head Direction Coding in the Human Brain

12 **Corresponding author email address:** [Jonathan.shine@dzne.de](mailto:Jonathan.shine@dzne.de)

13 **Number of pages:** 33

14 **Number of figures:** 6

15 **Abstract:** 246 words

16 **Introduction:** 650 words

17 **Discussion:** 1381 words

18 **Conflict of interest statement:** The authors declare no competing financial interests.

19 **Acknowledgements:** The authors would like to thank Dr Carl Hodgetts for helpful  
20 feedback on the manuscript.

21

22

23

24

25

26

27

1 **Significance statement**

2

3 Head direction (HD) cells provide a neural signal as to one's orientation in the  
4 environment. HD can be coded relative to global or local (e.g., room-specific)  
5 reference frames, with studies suggesting that distinct areas of thalamus and  
6 retrosplenial cortex (RSC) code for this information. We reanalysed fMRI data where  
7 human participants associated images with global HDs before undergoing scanning.  
8 The design enabled us to examine both global and local HD coding. Supporting  
9 previous findings, global HD was decodable in thalamus, however the RSC coded  
10 only for local HD. We found evidence also for both reference frames in V1. These  
11 findings elucidate the putative neural basis of HD coding in humans, with distinct brain  
12 regions coding for different HD reference frames.

13

14

15

16

17

18

19

20

21

22

23

24

25

1 **Abstract**

2

3 Orientation-specific head direction (HD) cells increase their firing rate to indicate one's  
4 facing direction in the environment. Rodent studies suggest HD cells in distinct areas  
5 of thalamus and retrosplenial cortex (RSC) code either for global (relative to the wider  
6 environment) or local (e.g., room-specific) reference frames. To investigate whether  
7 similar neuroanatomical dissociations exist in humans, we reanalysed functional  
8 magnetic resonance imaging data in which participants learned the orientation of  
9 unique images in separate local environments relative to distinct global landmarks  
10 (Shine, Valdés-Herrera, Hegarty, & Wolbers, 2016). The environment layout meant that  
11 we could establish two separate multivariate analysis models in which the HD on  
12 individual trials was coded relative either to global (North, South, East, West) or local  
13 (Front, Back, Right, Left) reference frames. Examining the data first in key regions of  
14 interest (ROI) for HD coding, we replicated our previous results and found that global  
15 HD was decodable in the thalamus and precuneus; the RSC, however, was sensitive  
16 only to local HD. Extending recent findings in both humans and rodents, V1 was  
17 sensitive to both HD reference frames. Additional small volume-corrected searchlight  
18 analyses supported the ROI results and indicated that the anatomical locus of the  
19 thalamic global HD coding was located in the medial thalamus, bordering the anterior  
20 thalamus, a region critical for global HD coding in rodents. Our findings elucidate  
21 further the putative neural basis of HD coding in humans, and suggest that distinct  
22 brain regions code for different frames of reference in HD.

23

24

25

## 1 **Introduction**

2

3 Determining one's facing direction in the world is imperative for successful navigation.

4 Head direction (HD) cells, found in brain regions including the thalamus and

5 retrosplenial cortex (RSC), signal an animal's facing direction via increased firing when

6 the animal assumes the cell's preferred orientation in the environment (Taube, 2007).

7 With individual neurons signalling different HDs, the result is that of a neural compass

8 providing essential input for other spatially-tuned neurons including place and grid

9 cells (Harland et al., 2017; Winter, Clark, & Taube, 2015).

10 Theoretical models propose that HD cells form a ring attractor network (Knierim &

11 Zhang, 2012). Cells proximal to one another on the ring signal similar facing directions

12 and share excitatory interconnections, whereas distal cells, representing different

13 directions, have inhibitory connections. This connectivity results in a bump of activity

14 indicating the animal's HD, which moves around the ring as a function of changes in

15 orientation with respect to external landmarks and internally generated proprioceptive

16 cues. This network structure has been observed in drosophila (Kim, Rouault,

17 Druckmann, & Jayaraman, 2017) and other insects (Pisokas, Heinze, & Webb, 2020)

18 but not more complex species, perhaps due to architectonically different arrangement

19 of the ring attractor. Functional magnetic resonance image (fMRI) detects putative

20 neural signals at the macroscopic level. As such, it is possible that HD cells distributed

21 across cortex could contribute to a voxel-level signal, akin to the *in-vivo* study of grid

22 cell signals in humans using fMRI (Stangl, Wolbers, & Shine, 2019).

23 Both global and local reference frames can be used to guide navigation.

24 Behaviourally, there is evidence that while participants can integrate various route

25 components into a single global reference frame (Mou, McNamara, & Zhang, 2013),

1 local environment cues (e.g., the intrinsic geometry defined by the long axis of a room)  
2 also provide a reference frame for orientation (Mou & McNamara, 2002). At the neural  
3 level, in the RSC Jacob et al. (2017) found not only HD cells that tracked orientation  
4 relative to distal landmarks but also neurons tuned to the direction of local, room-  
5 specific environment cues. These findings accord with human multivariate fMRI  
6 results where activity patterns in the retrosplenial complex (a functionally-defined  
7 region extending beyond RSC) tracked information regarding local, but not global HD  
8 (Marchette, Vass, Ryan, & Epstein, 2014). More recently, Koch, Li, Polk, and Schuck  
9 (2020) found evidence for a multivariate global HD signal in RSC using a naturalistic  
10 navigation paradigm, supporting previous univariate results (Baumann & Mattingley,  
11 2010; Shine et al., 2016). Similarly, the thalamus, a key HD region integrating body-  
12 based and visual information in rodents (Clark, Bassett, Wang, & Taube, 2010) and  
13 humans (Shine et al., 2016), is also hypothesised to represent distinct reference  
14 frames (Clark & Harvey, 2016) with anterior and lateral thalamus coding for global and  
15 local reference frames, respectively. These studies beg the question, however, of  
16 whether RSC and thalamus support concurrently distinct HD reference frames.

17 Despite its role in visual processing, converging evidence from rodent (Haggerty  
18 & Ji, 2015; Pakan, Currie, Fischer, & Rochefort, 2018; Saleem, Diamanti, Fournier,  
19 Harris, & Carandini, 2018), and human (Koch et al., 2020) studies suggest that area  
20 V1 codes also for HD. Although Koch et al. implemented analysis methods to  
21 decorrelate visual and HD information in a continuous navigation paradigm, a more  
22 stringent test of V1's contribution to HD representations would separate the learning  
23 of HD, with its associated visual confounds, and the scanned test phase.

24 To address these questions, we used multivariate decoding to test for global and  
25 local HD signals across (sub)cortical structures previously implicated in HD coding.

1 To achieve this aim, we re-examined data from Shine et al. (2016) where we observed  
2 univariate markers of HD coding in the thalamus, RSC, and precuneus. The study  
3 design provided us with the unique opportunity to explore global and local HD coding  
4 in the same task, as well as minimising visual confounds due to the separation of  
5 learning and the scanned test phases.

6

## 7 **Materials and methods**

8

### 9 Participants

10

11 Nine healthy volunteers (two female, seven male; age range 19-32), with normal or  
12 corrected-to-normal vision participated in the experiment at the UC Santa Barbara  
13 Brain Imaging Centre. The study received ethical approval from the local ethics  
14 committee.

15

### 16 Procedure

17

18 For a detailed description of the paradigm, see Shine et al. (2016). Briefly, participants  
19 first explored a virtual environment (VE) outside of the MRI scanner whilst wearing a  
20 head mounted display (HMD). The environment comprised four galleries that were  
21 connected via a walkway, and four global landmarks (City, Bridge, and two mountain  
22 ranges) were rendered at infinity and provided cues to global HD. Each gallery  
23 contained a unique category of stimuli (Abstract art, Animals, Colour, Shapes), with  
24 the images on the walls inside the gallery aligned with the global landmarks in the  
25 environment. Participants were required to learn these individual images associated

1 with the different global landmarks, which resulted in a unique quartet of images  
2 associated with each global HD (North, South, East, and West). The images inside  
3 each gallery were located either to the participant's front, back, right or left upon  
4 entering the room. Facing direction in the environment was controlled via the  
5 participant physically rotating whereas translations were controlled via a button press.

6 After they had visited each gallery once, participants were tested on their  
7 knowledge of the environment via a judgement of relative direction task. Each of the  
8 16 individual gallery images was presented separately and a text prompt asked the  
9 participants to point a joystick in the direction of a specific global landmark.  
10 Participants proceeded to the scanner phase of the experiment after they had passed  
11 the criterion (< 10 degree mean pointing error).

12 After successfully completing the learning, participants underwent scanning in  
13 which they were presented with the individual images from the galleries. Participants  
14 performed a one-back task regarding the associated global HD of each item, such  
15 that they pressed one button if the image was a repetition of the HD, and another  
16 button if HD was not repeated over consecutive trials. The 16 items were repeated  
17 twice per run, serving once as a non-repeat of HD and once as a repeat of HD.  
18 Importantly, gallery identity was not repeated (e.g., an image from the Abstract Art  
19 gallery never preceded itself). The scan session comprised eight runs, with images  
20 presented for five seconds and an inter-trial interval of 6-8 seconds. The design of the  
21 VE meant that it was possible to code trials according to different HD reference  
22 frames: 1) global head direction (GHD), in which images are coded according to their  
23 alignment with global environment landmarks, and 2) local head direction (LHD), in  
24 which images are coded according to their position relative to the participant when

1 entering a gallery (Figure 1A). Importantly, repetition status (non-repeat and repeat)  
2 was balanced across the different conditions.

3

4 Statistical analysis

5

6 Analysis of accuracy and reaction times (RTs) were conducted using R (version 3.6.3)  
7 with R-Studio (version 1.3.1056) and the afex package (version 0.28-0; Singmann,  
8 Bolker, Westfall, & Aust, 2018). Data were submitted to a repeated-measures ANOVA  
9 with four levels comprising either the GHD (North, South, East, West) or LHD (Front,  
10 Back, Right, Left). We tested also accuracy and RT as a function of the degree of  
11 angular disparity between subsequent trials in the run for both GHD and LHD. For  
12 example, if the first trial in the run was associated with GHD North, and the second  
13 trial GHD South, this second trial would comprise an angular disparity of 180 degrees.  
14 Relative to GHD North, subsequent GHD East or West trials were coded as 90  
15 degrees. The same coding logic was applied to the LHD condition and the resulting  
16 values submitted to repeated-measures ANOVA with three levels (0, 90, 180 degrees)  
17 for GHD and LHD, respectively. For all analyses, where required, corrections for  
18 sphericity were made using Greenhouse-Geisser. Tukey's post-hoc tests were used  
19 to interrogate significant main effects. Permutation-based analysis methods  
20 employed for the neuroimaging data are outlined below.

21

22 MR imaging parameters

23

24 Imaging data were acquired using a 3T MRI scanner (Siemens Trio), with a standard  
25 receiver head coil. Twenty-five contiguous axial slices (3mm thickness), oriented to



1 include key regions of interest (i.e., RSC, thalamus), were acquired using a T2\*-  
2 weighted echo planar imaging (EPI) sequence (TR/TE = 1340/30ms; flip angle = 90  
3 degrees; voxel size = 3mm isotropic, FoV = 192\*192mm). A high resolution T1-  
4 weighted, whole-brain anatomical scan was acquired prior to the EPI data for each  
5 participant (TR/TE = 15/4.2ms; flip angle = 20 degrees; voxel size = 0.9mm isotropic,  
6 FoV = 240\*240mm).

7

8 fMRI data preprocessing and analysis

9

10 Data preprocessing was conducted using FSL v6.0 (FMRIB) (Jenkinson, Beckmann,  
11 Behrens, Woolrich, & Smith, 2012; Smith et al., 2004). The eight EPI runs were pre-  
12 processed as follows: The runs were concatenated, and a mean image created, and  
13 all eight runs were then realigned to the mean image, creating six motion parameters.  
14 The echoplanar imaging (EPI) data were skull-stripped, high-pass filtered, but left  
15 unsmoothed. For the region of interest (ROI) analyses, all analysis was performed in  
16 the participant's native EPI space; for the whole-brain searchlight, functional data  
17 were non-linearly warped using FNIRT (Andersson, Jenkinson, & Smith, 2007) to the  
18 MNI-152 template.

19 To examine the two different spatial properties, three different general linear  
20 models (GLMs) were implemented, with each fMRI run modelled separately. In the  
21 GHD model, four regressors were created corresponding to whether the images in  
22 the galleries were aligned to the North, South, East, or West of the environment. In  
23 the LHD model, the four regressors reflected the arrangement of images as the  
24 participant entered the gallery (i.e., Front, Back, Right or Left). All regressors were  
25 convolved with a double-gamma HRF. In addition to the four regressors described for

1 each model, each GLM included the six motion parameters, their derivatives, and the  
2 squares of these values (24 motion regressors in total) as nuisance regressors. For  
3 each run the resulting t-stat images associated with the four conditions in each  
4 separate model were used for the decoding analysis. A suite of Python (version 3.6.7)  
5 packages including pandas (version 0.20.3; McKinney, 2010) and NumPy (version  
6 1.14.2; Harris et al., 2020) were used to analyse the data. NiBabel (version 2.1.0; Brett  
7 et al., 2019) was used to load the t-stat images, and the decoding analysis carried out  
8 using Scikit-learn (version 0.18.1; Pedregosa et al., 2012). Decoding results were  
9 plotted using Seaborn (version 0.7.1; Waskom et al., 2016).

10 In line with the best practices of decoding (Varoquaux et al., 2017), we used a  
11 nested-cross validation procedure with a linear Support Vector Classifier (SVC) where  
12 we determined the best performing decoding parameters via grid search to obtain an  
13 unbiased estimate of decoding accuracy. The decoding analysis pipeline comprised  
14 Z-scoring the data across voxels, univariate feature-selection via an F-test, and  
15 multivariate decoding using a Linear SVC. For the F-test, we selected either the voxels  
16 with the 20<sup>th</sup> percentile highest F-scores, or all voxels (i.e., the 100<sup>th</sup> percentile) in the  
17 region of interest (ROI). For the linear SVC, the C-parameter ranged from  $10^{-3}$  to  $10^3$   
18 in steps of  $10^1$ . To determine an unbiased estimate of decoding accuracy, we used  
19 nested cross-validation where one of the eight runs of data was partitioned as the  
20 validation-set and not used for tuning of the model's hyper-parameters (i.e., feature-  
21 selection F-test percentile and SVC C-value). For the remaining seven runs, the data  
22 were partitioned into seven train-test splits, and all combinations of the F-test and C-  
23 parameter values crossed to determine the combination of best performing  
24 parameters. These values were then fit on the seven runs and used to predict class  
25 label in the unseen validation-set. This procedure was repeated eight times so that

1 every run served as a validation set. The scores of these eight runs were then  
2 averaged to generate a participant-specific decoding accuracy and averaged across  
3 participants to determine the group-level decoding accuracy.

4 To determine the  $p$ -value associated with the group-level decoding accuracy, we  
5 generated 1000 shuffled orders (without repetition) of the condition labels that  
6 respected the frequency of target labels per run. We repeated the analysis pipeline  
7 with each of the shuffled orders, resulting in a null distribution of 1000 group-level  
8 decoding accuracies. The  $p$ -value was calculated as the number of times the null  
9 group-level decoding accuracies equalled or exceeded the observed group-level  
10 decoding accuracy, divided by the number of permutations; one was added to both  
11 the numerator and denominator of this calculation to ensure that the  $p$ -value never  
12 equalled 0 (an overview of the analysis method is shown in Figure 1B).

13 The decoding analyses were carried out in regions of interest (ROIs) that have been  
14 shown to be involved in HD coding in humans. Specifically, we examined decoding in  
15 the thalamus segmented using FSL's FIRST, the RSC derived from Freesurfer (Shine  
16 et al., 2016), and probabilistic masks of V1 and precuneus from the Harvard-Oxford  
17 subcortical atlas; probabilistic masks were thresholded at 50% likelihood of the target  
18 ROI. Anatomical masks of thalamus and RSC were warped to the subject's native  
19 EPI-space via the inverse of the EPI-to-T1 Affine matrix, and the probabilistic masks  
20 were warped from MNI-space using the inverse of the EPI-MNI matrix.

21 We implemented also a whole brain searchlight to examine brain regions outside  
22 of our target ROIs where we could reliably decode the different spatial properties. The  
23 searchlight procedure followed that detailed by Stelzer, Chen, and Turner (2013).  
24 Specifically, we used a searchlight radius of 6mm (i.e., two voxels, which has been  
25 shown to perform best in searchlight analyses; Kriegeskorte, Goebel, & Bandettini,

1 2006) and ran the same decoding analysis pipeline detailed above, with the exception  
2 that the SVC C-parameter was fixed at one to reduce the computational burden. First,  
3 for each participant we ran the whole brain searchlight with the correct condition  
4 labels where the decoding accuracy was assigned to the central voxel of the  
5 searchlight sphere. This provided a whole brain decoding accuracy map. The  
6 individual participant accuracy maps were then moved to standard MNI space and  
7 averaged across participants to obtain a whole brain, group-level decoding accuracy  
8 map. To generate the null distribution with which to compare the group-level decoding  
9 accuracy map, we first repeated the searchlight analysis with 100 permutations of the  
10 condition labels for each participant. The 100 permuted accuracy maps were then  
11 also moved to MNI space. We created a mask that contained voxels in which all  
12 participants' data overlapped and used this to mask the searchlight results. We then  
13 randomly selected one of the 100 permutations (with replacement) per participant and  
14 averaged these values to generate a group-level permuted accuracy map. This  
15 random selection was repeated 100,000 times resulting in 100,000 permuted  
16 accuracy maps that formed the basis for our null distribution. For each voxel we had  
17 100,000 accuracy values comprising the voxel-wise null distribution, and we used a  
18 threshold of  $p < 0.01$  to determine an accuracy threshold that had a low probability of  
19 occurring by chance. These voxel-wise threshold accuracy values were then applied  
20 to both the group level decoding accuracy map as well as the 100,000 permuted  
21 group accuracy maps. Voxels surviving the threshold were binarized and cluster  
22 statistics performed on the group level decoding accuracy map, as well as each of  
23 the permuted group accuracy maps, using FSL's cluster; a cluster comprised two or  
24 more voxels that shared a face (i.e., connectivity = 6). We recorded all resulting  
25 clusters and their frequency from the permuted group accuracy maps, which allowed

1 us to estimate the probability of observing by chance a cluster of a given size in the  
 2 group level decoding accuracy map (i.e., number of clusters of a given size larger than  
 3 our observed cluster divided by the total number of clusters in the permuted accuracy  
 4 maps). To correct for multiple comparisons, for all the clusters of the group level  
 5 decoding accuracy map, we applied a step-down FDR correction (Benjamini & Liu,  
 6 1999) as implemented in R package Mutoss (version 0.1-12). Whole brain searchlight  
 7 results were rendered on the MNI-152 template using MRICroGL (version  
 8 1.2.20200331).

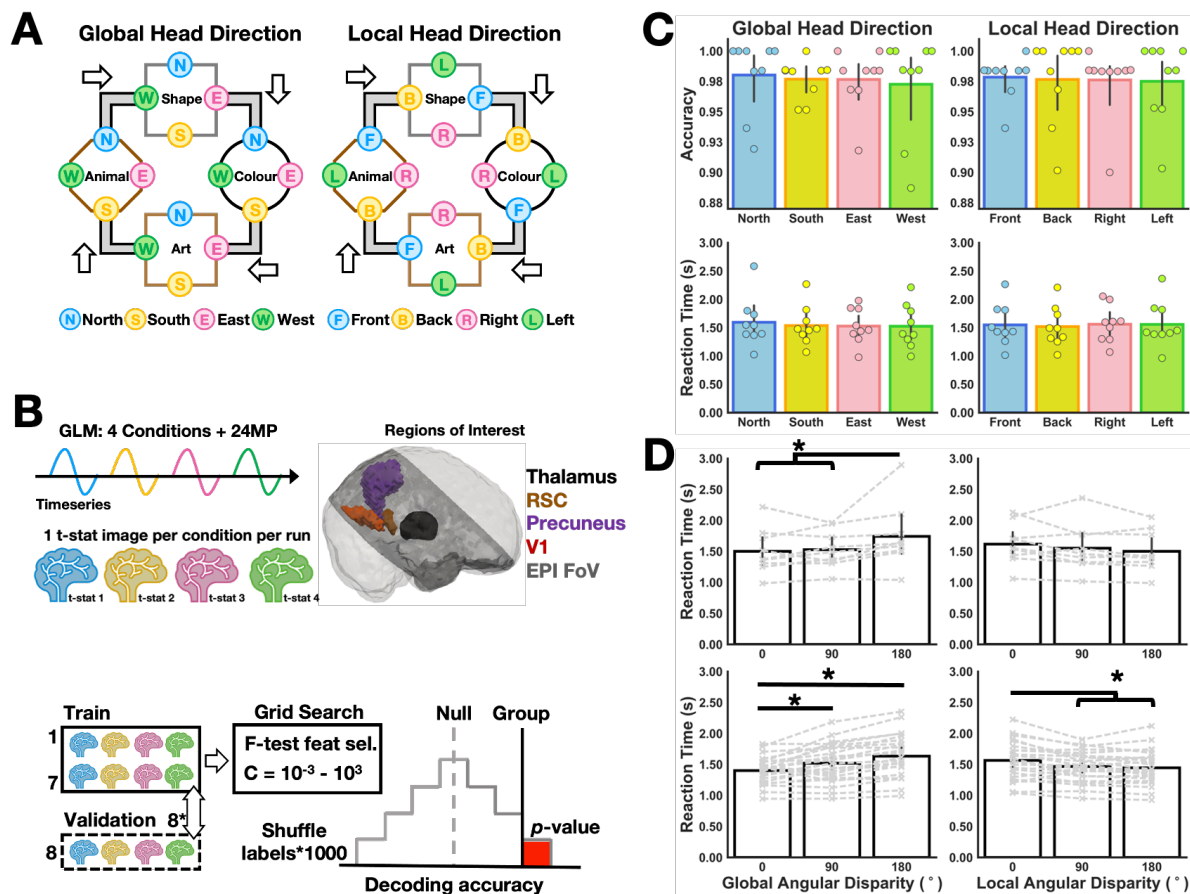

9  
 10 **Figure 1. Overview of study design, preprocessing and behavioural performance.** (A) The virtual  
 11 environment consisted of four different galleries connected via walkways; the participant's travel  
 12 direction is indicated via the white arrows. Individual trials, comprising the four individual images inside  
 13 each gallery, were coded for 'Global Head Direction' (i.e., the global reference frame defined by the  
 14 external landmarks in the virtual environment; North, South, East, West), or 'Local Head Direction' (i.e.,

1 the local reference frame defined by the location of items as the participant entered the gallery; Front,  
2 Back, Right, Left), (B) Two separate general linear models (GLM) were created for the different reference  
3 frames. For each model, four regressors were used to model the conditions of interest, and the 24  
4 motion parameters (MP) were added as nuisance regressors. This resulted in four t-stat images per run  
5 (32 images in total across eight runs), that were used for the decoding analysis in our key regions of  
6 interest for HD (i.e., thalamus, RSC, precuneus, V1). We used leave one-run-out nested cross-  
7 validation with a linear support vector classifier (SVC). To gain an unbiased estimate of decoding  
8 accuracy, the data were partitioned into train-test splits with one run left out to validate the accuracy  
9 of the model trained on the remaining data. In an inner loop, grid search was used to find the optimum  
10 combination of feature selection (using an F-test) and C-parameter for the SVC. This train-test split  
11 was repeated until all runs had served once as the validation dataset, and the mean score calculated  
12 per-participant, and for the group per-ROI. To determine the p-value associated with the group-level  
13 decoding accuracy, we created 1000 unique random shuffles of the condition labels and repeated the  
14 decoding analysis to generate a null distribution. The p-value was calculated as the number of times  
15 the decoding accuracy from the null distribution exceeded the observed group-level decoding  
16 accuracy, divided by the number of permutations. (C) Performance was matched across all conditions  
17 for each of the different models. (D) Upper panel: For the fMRI sample, grouping trials according to the  
18 angular disparity between consecutive trials revealed that reaction times were modulated in the GHD  
19 condition, such that differences of 180 degrees were significantly longer than 0 and 90 degrees. Lower  
20 panel: Repeating the paradigm in a larger behavioural sample (n=24) supported the results in the fMRI  
21 sample and showed a stepwise increase in RT according to the degree of GHD angular disparity. (\* =  
22  $p < 0.05$ ); individual participant's data displayed as a dashed grey line.

23

## 24 **Results**

25

### 26 Behavioural

27

28 Participants were trained to discriminate GHD to a high level of accuracy outside of  
29 the scanner. Reflecting this training, participants retained this high level of

1 performance on the 1-back task during the scanner task (Figure 1). Importantly, for  
2 decoding, accuracy ( $F(1.74, 13.88) = 0.24, p = 0.76, \eta^2 = 0.009$ ) and reaction times  
3 ( $F(1.85, 14.76) = 0.56, p = 0.57, \eta^2 = 0.007$ ) were matched across the four different  
4 GHDs (Figure 1C). Coding the trials according to LHD did not affect the pattern of  
5 data in terms of accuracy and reaction times (all  $F_s < 0.35, p_s > 0.69, \eta^2 < 0.003$ ).

6         According to the architecture of ring attractor networks (Knierim & Zhang,  
7 2012; Zhang, 1996), HD cells coding for similar orientations predominantly share  
8 excitatory connections whereas cells coding for very disparate orientations share  
9 more inhibitory connections. Ring attractor dynamics would therefore predict that  
10 reaction times should vary as a function of the degree of angular disparity between  
11 consecutive trials. For example, if a given trial was associated with GHD north (0  
12 degrees) and the next trial was associated with GHD south (180 degrees), this angular  
13 disparity of 180 degrees should be harder to overcome than a disparity of 90 degrees.  
14 We performed this analysis both for GHD and LHD (Figure 1D). For GHD, we observed  
15 a main effect of angular disparity ( $F(1.41, 11.31) = 6.32, p = 0.02, \eta^2 = 0.075$ ), which  
16 was driven by reduced reaction times for 0 versus 180 ( $t(16) = -3.25, p = 0.013$ ), and  
17 90 versus 180 degrees ( $t(16) = -2.87, p = 0.028$ ); angular disparities 0 and 90 degrees  
18 did not differ ( $t(16) = -0.38, p = 0.924$ ). LHD reaction times were not influenced by the  
19 angular disparity between subsequent trials ( $F(1.29, 10.35) = 2.51, p = 0.14, \eta^2 = 0.02$ ).

20         To test the veracity of our behavioural results, we repeated the paradigm in an  
21 additional sample of 24 participants (14 female, 10 male; mean age: 24.2, age range:  
22 20–31). The paradigm was identical except that the intertrial interval was reduced to  
23 two seconds. Examining first the GHD, we found a significant main effect of angular  
24 disparity ( $F(1.33, 30.5) = 24.246, p < 0.001, \eta^2 = 0.098$ ), with a step-wise increase in  
25 RT according to increasing angular disparity (Figure 1D). Specifically, 0 degree



1 changes in GHD were significantly faster than 90 ( $t(46) = -3.53, p = 0.003$ ) and 180  
2 degree changes ( $t(46) = -6.96, p < 0.0001$ ); 90 degree changes in GHD were also  
3 significantly quicker than 180 degrees ( $t(46) = -3.43, p = 0.004$ ). The same analysis for  
4 LHD revealed a main effect of angular disparity  $F(1.59, 36.54) = 13.58, p = 0.0001, \eta^2$   
5  $= 0.034$ ). This main effect was driven by significantly longer responses for 0 versus 90  
6 and 180 degree changes in LHD ( $t(46) = 4.01, p = 0.0006$  and  $t(46) = 4.89, p < 0.0001$ ,  
7 respectively); 90 and 180 degree changes in LHD did not differ ( $t(46) = 0.88, p = 0.66$ ).

8

## 9 Decoding in ROIs

10

11 Our multivariate analyses first focussed upon regions of the brain previously shown  
12 to be involved in HD coding, namely the thalamus, RSC, precuneus, and V1. For each  
13 ROI, we examined the decoding accuracy of the two different reference frames (GHD  
14 and LHD) and calculated the corresponding p-value derived from a null distribution  
15 generated via 1000 permutations of the condition labels. For GHD (Figure 2), we could  
16 decode different directions relative to the distal landmarks with above chance  
17 accuracy in bilateral thalamus ( $p = 0.007$ ), precuneus ( $p = 0.048$ ) and V1 ( $p = 0.001$ ).  
18 In contrast to our previous univariate results (Shine et al., 2016), there was no evidence  
19 of multivariate signal for GHD in RSC ( $p = 0.419$ ). Next, we examined the coding of  
20 gallery-specific LHD in the same ROIs (Figure 3). Unlike GHD, it was possible to  
21 decode LHD in RSC ( $p = 0.049$ ). In line with the results for GHD, V1 contained  
22 information also regarding LHD ( $p = 0.002$ ). It was not possible, however, to decode  
23 LHD in thalamus ( $p = 0.266$ ) or precuneus ( $p = 0.237$ ).



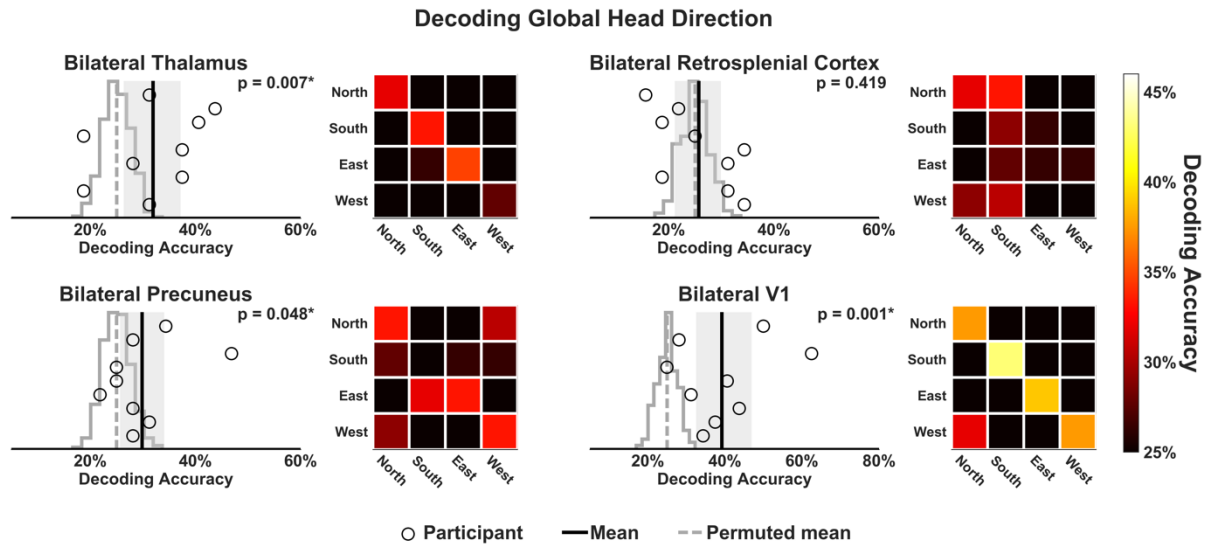

1

2 **Figure 2. Decoding Global Head Direction in key HD ROIs.** The linear SVC revealed significantly

3 above chance decoding accuracy of GHD in bilateral thalamus (top left), precuneus (bottom left) and

4 V1 (bottom right). Individual subject's data are displayed as black circles, with the mean group

5 decoding accuracy denoted by the solid black vertical line. The grey shading indicates the 95%

6 confidence interval around the mean group accuracy, calculated using bias-corrected and accelerated

7 bootstrap with 1000 samples with replacement of the subjects' decoding scores. The confusion

8 matrices, located to the right of each plot, show the mean group decoding accuracy separated

9 according to the different HDs.

10

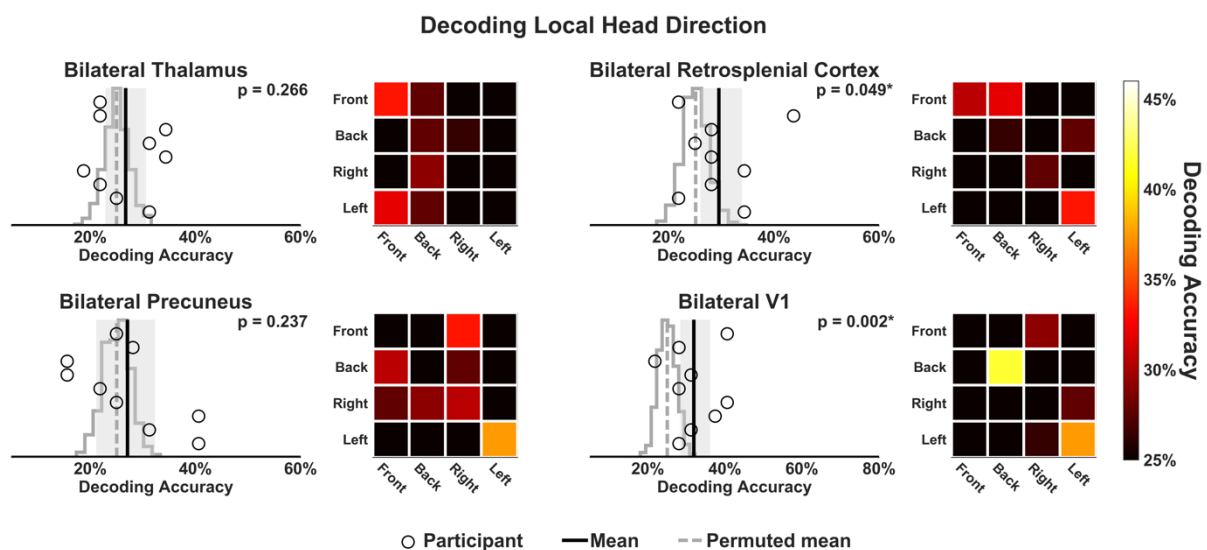

11

12 **Figure 3. Decoding Local Head Direction in key HD ROIs.** The linear SVC revealed significantly

13 above chance decoding accuracy of LHD in bilateral RSC only (top right). Individual subject's data are

1 displayed as black circles, with the mean group decoding accuracy denoted by the solid black vertical  
2 line. The grey shading indicates the 95% confidence interval around the mean group accuracy,  
3 calculated using bias-corrected and accelerated bootstrap with 1000 samples with replacement of the  
4 subjects' decoding scores. The confusion matrices, located to the right of each plot, show the mean  
5 group decoding accuracy separated according to the different HDs.

6

## 7 Searchlight analysis

8

9 To examine whether regions of cortex outside of our ROIs code for different HD  
10 reference frames, we conducted whole brain decoding using a searchlight sphere with  
11 a radius of 6mm and implemented the same decoding scheme. For GHD, four clusters  
12 survived FDR correction at the whole brain level. Consistent with the ROI analyses,  
13 one cluster was located in the precuneus (Figure 4), while another was located inferior  
14 to the precuneus and posterior to the RSC. The remaining two clusters were located  
15 in the lateral occipital cortex and occipital pole (Figure 5). The same analysis  
16 conducted for LHD did not yield any significant clusters.

17 To provide greater insight into the anatomical location of the GHD coding  
18 effects located in the thalamus in the ROI analysis, we applied a small volume  
19 correction and re-ran the searchlight in the bilateral thalamus mask. Using the same  
20 6mm searchlight radius, we found a significant cluster of above chance decoding  
21 accuracy located in left medial thalamus (Figure 6). To ensure that the result was not  
22 an artifact of the searchlight radius (Etzel, Zacks, & Braver, 2013), we repeated the  
23 analysis in the thalamus with different searchlight radii to examine the consistency of  
24 the results. At 3mm, the decoding accuracy was not significant ( $p = 0.07$ ), but with  
25 searchlight radii larger than the 6mm used initially (i.e., at 9mm and 12mm) we again  
26 identified significant clusters in the left medial thalamus, bordering the anterior

1 thalamus (Figure 6). Despite the absence of any significant effects for LHD in the  
2 whole brain searchlight, for completeness, we conducted the same analysis for LHD  
3 in thalamus. This analysis, however, did not reveal any significant clusters regardless  
4 of the searchlight radius.

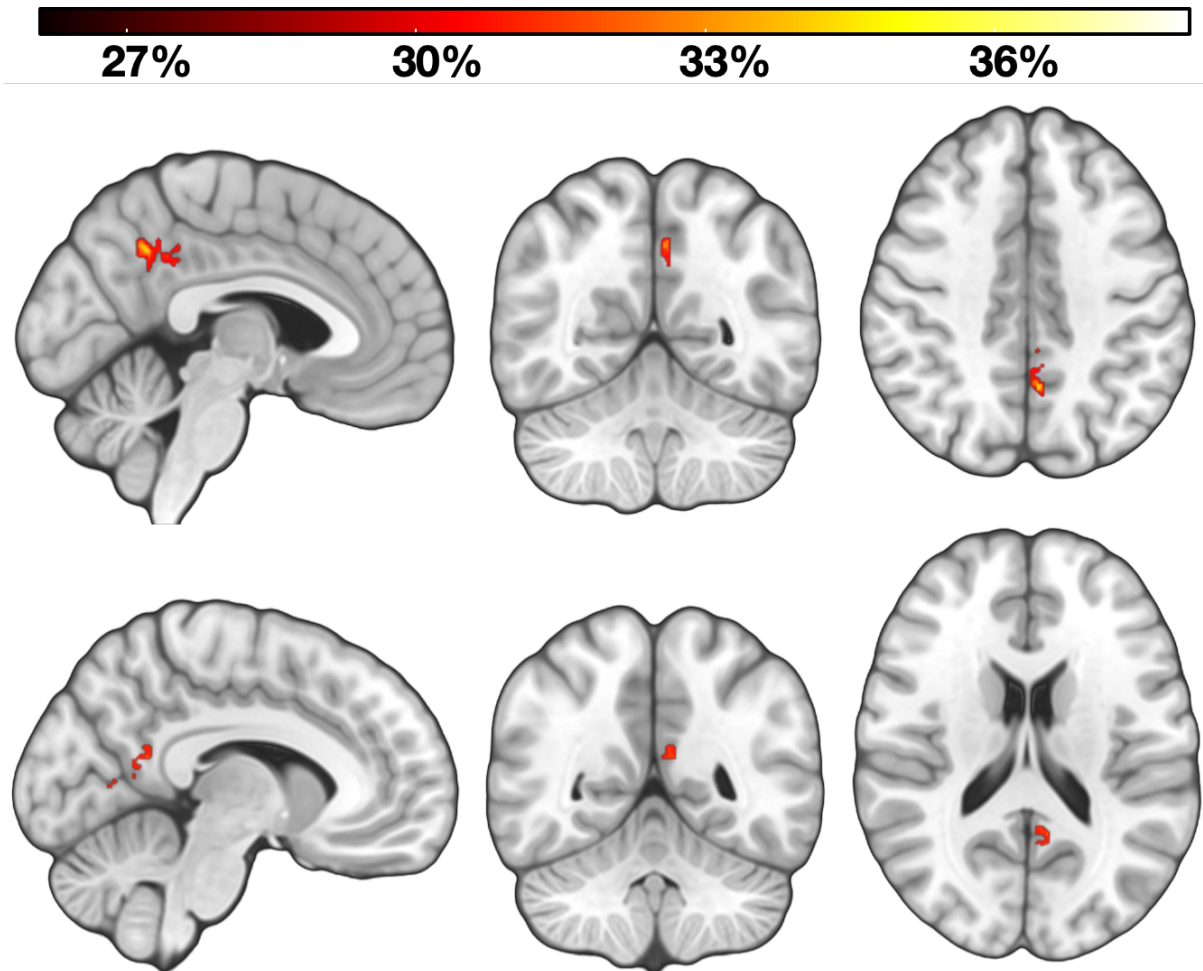

5  
6 **Figure 4. Whole brain searchlight decoding of Global Head Direction in precuneus/posterior**  
7 **medial cortex.** Using a whole brain searchlight we found two clusters of above chance decoding  
8 accuracy in the posterior medial cortex. Upper panel: One cluster was located in the  
9 precuneus/posterior cingulate (-4, -56, 42; 80 voxels; peak decoding accuracy = 36.8%; FDR-adjusted  
10  $p$ -value = 0.007). Lower panel: the other cluster was located posterior to the retrosplenial cortex (-8, -  
11 52, 18; 63 voxels; peak decoding accuracy = 35.4%; FDR-adjusted  $p$ -value = 0.02). The heatmaps  
12 reflect percent decoding accuracy.

13

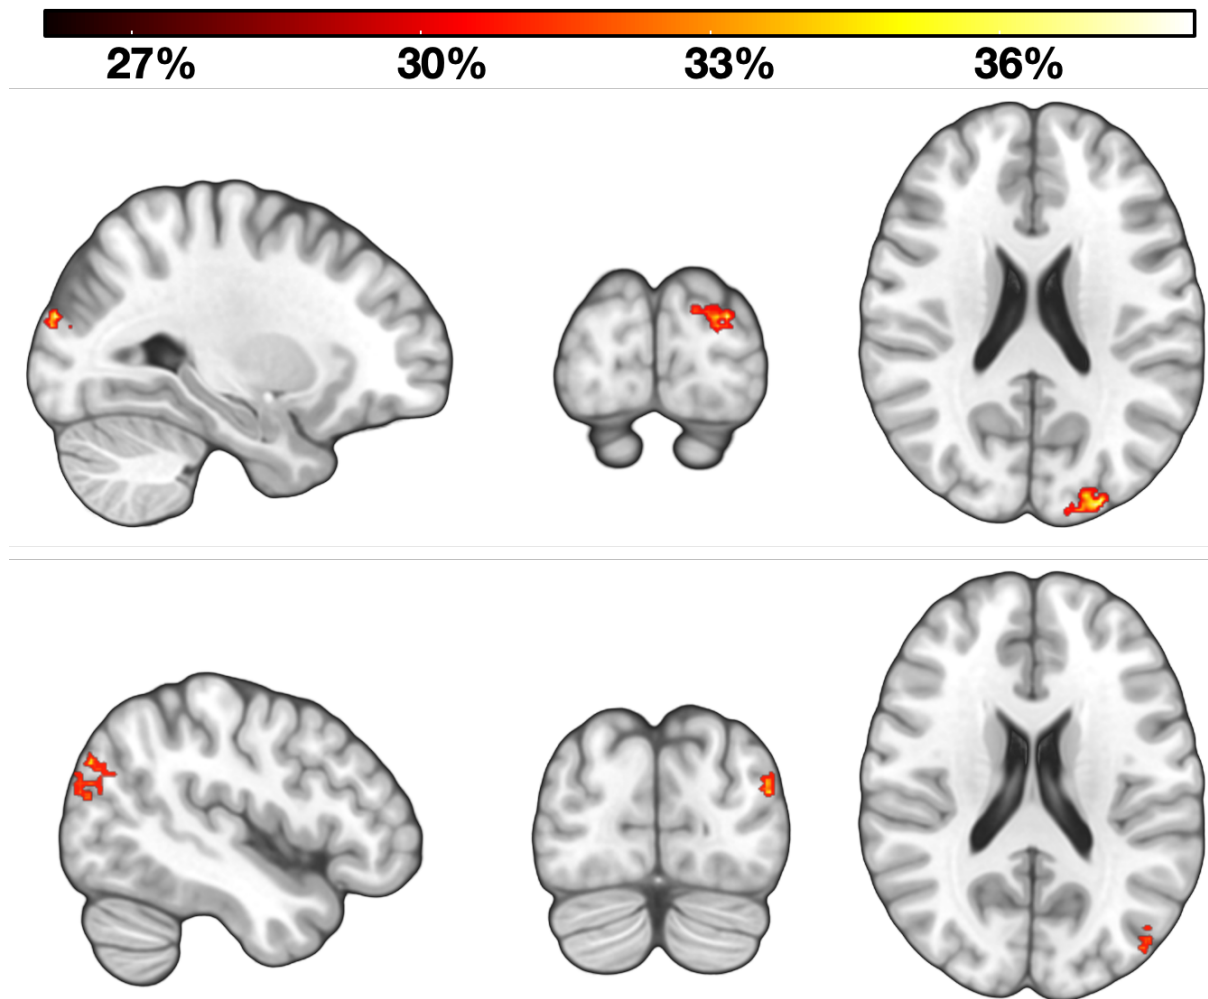

1

2 **Figure 5. Whole brain searchlight decoding of Global Head Direction.** Two additional clusters of  
3 above-chance decoding accuracy were identified in the whole brain searchlight analysis. Upper panel:  
4 Occipital pole/Lateral occipital cortex (-28, -92, 22; 146 voxels; peak decoding accuracy = 38.9%;  
5 FDR-adjusted p-value = 0.0002). Lower panel: Lateral occipital cortex (-46, -82, 20; 114 voxels; peak  
6 decoding accuracy = 37.2%; FDR-adjusted p-value = 0.0008). The heatmap reflects percent decoding  
7 accuracy.

8

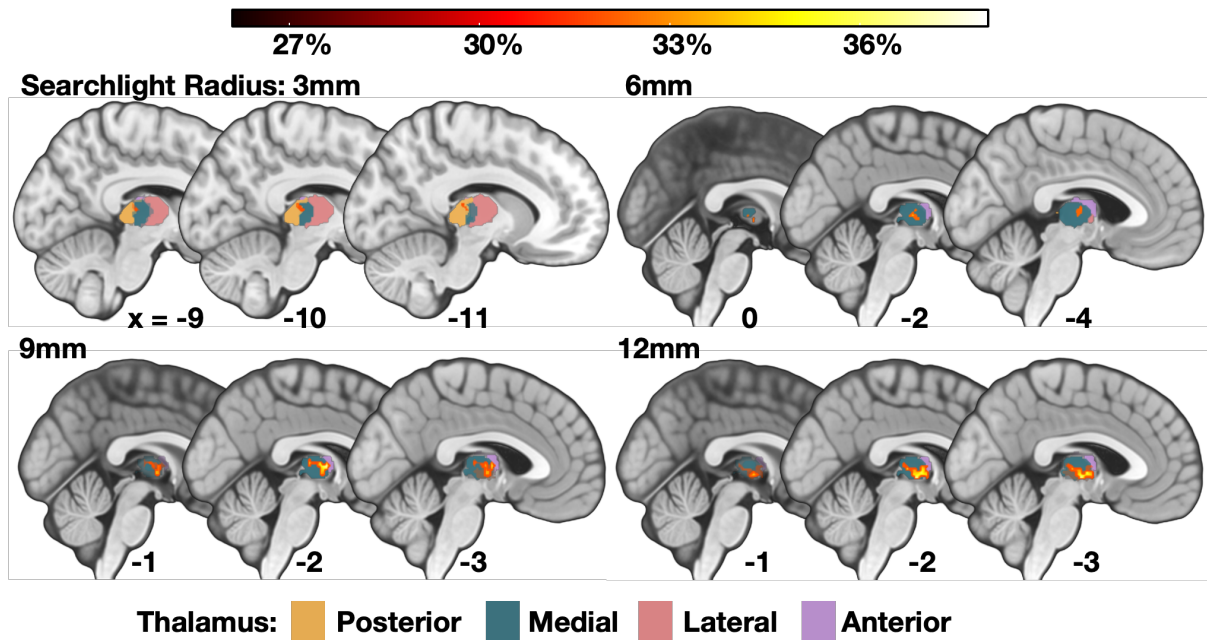

1

2 **Figure 6. Small-volume-correction decoding of Global Head Direction in bilateral thalamus using**

3 **different searchlight radii.** Using a small volume correction, we found a significant cluster of above

4 chance decoding accuracy located in the left thalamus using a 6mm searchlight radius, consistent with

5 the whole brain methods (-2, -6, 6; 18 voxels; peak decoding accuracy = 34.7%; FDR-adjusted  $p$ -value

6 = 0.044). To examine the reliability of this effect, we conducted the same analysis using additional

7 searchlight radii (3, 9, and 12mm). For the 3mm searchlight, we could not reliably decode GHD (0, -10,

8 -2; 7 voxels; peak decoding accuracy = 33.7%; FDR-adjusted  $p$ -value = 0.07). For both the larger 9

9 and 12mm radii, however, there was evidence of GHD information located in medial thalamus,

10 bordering the anterior thalamus (9mm: -2, -6, 6; 69 voxels; peak decoding accuracy = 36.8%; FDR-

11 adjusted  $p$ -value = 0.016; 12mm: -2, -12, -2; 131 voxels; peak decoding accuracy = 36.8%; FDR-

12 adjusted  $p$ -value = 0.018). Probabilistic maps of thalamic subregions created from (Krauth et al., 2010).

13 Values beneath each sagittal slice indicate  $x$  coordinate. The heatmaps reflect percent decoding

14 accuracy.

15

## 16 Discussion

17

18 We explored the contribution of key ROIs involved in HD to the decoding of different

19 spatial reference frames by performing a reanalysis of the data from Shine et al.

1 (2016). Extending previous findings, we found that the human thalamus contains a  
2 multivariate signal of GHD but not LHD. Consistent with univariate results, this GHD  
3 information was present also in the precuneus, and, in line with recent findings (Koch  
4 et al., 2020), V1. In RSC, however, it was possible to decode only the LHD. As well as  
5 GHD, LHD information was also evident in V1.

6 In line with our previous findings (Shine et al., 2016), our results suggest that the  
7 thalamus contains a GHD signal. Our searchlight analyses indicate that this effect  
8 located in the left medial thalamus, bordering the anterior thalamus - a region  
9 comprising the anterior dorsal thalamic nuclei that contain HD cells in rodents. That  
10 the results were consistent at several different, but not all, searchlight radii suggests  
11 that the GHD results were not simply an artifact of the searchlight size. These data  
12 may reflect the coarse organisation of a ring attractor network in the thalamus, or at  
13 least a signal that can be extracted at the macroscopic level. Future rodent studies  
14 that sample a large number of neurons from the HD circuit will help elucidate possible  
15 patterns of network organisation of the HD system, although it will likely differ  
16 substantially across species (Pisokas et al., 2020). We observed also a pattern of  
17 behavioural data consistent with the predictions one might make based upon the ring  
18 attractor architecture, with greater angular disparity between consecutive trials' GHDs  
19 resulting in longer RTs, which we replicated in a larger behavioural sample. It is  
20 possible that such readouts might provide greater insight into ring attractor structure  
21 and/or integrity in humans.

22 In contrast to GHD, there was no evidence that the thalamus codes for LHD as  
23 previously hypothesised (Clark & Harvey, 2016). This was true even when using a  
24 whole brain searchlight analysis. Although we must be cautious when interpreting the  
25 absence of an effect, one possible explanation as to why coding for LHD was not



1 apparent is that participants were trained in our task to focus upon the global  
2 landmarks for HD. Despite these task demands it should be noted, however, that we  
3 did see decoding of LHD in other brain regions (i.e., RSC/V1). It could be the case that  
4 HD representations in different regions are modulated to a greater or lesser degree  
5 by attentional demands, and that representations in the thalamus change as a  
6 function of the reference frame required to solve the current navigational problem.  
7 Future studies that manipulate attention to different reference frames will be required  
8 to examine this question.

9 Unlike the univariate results observed in Shine et al. (2016), there was no evidence  
10 of a GHD signal in RSC. Consistent with Marchette et al. (2014), however, we could  
11 decode LHD. Our findings are at odds with recent data from Koch et al. (2020), in  
12 which they decoded walking direction in RSC. In their study, the environment  
13 comprised a single open arena and did not require the integration of different LHDs  
14 in service of a GHD. It could be argued, therefore, that this RSC effect represents the  
15 coding of a single local reference frame. The apparent inconsistencies between the  
16 results of the univariate analysis in Shine et al. (2016) and those reported here could  
17 reflect the structure of the RSC and the arrangement of the HD cells in the granular  
18 and dysgranular cortex. In Jacob et al. (2017), bidirectional HD cells were detected  
19 almost exclusively in the dysgranular RSC, whereas traditional HD cells, which were  
20 sensitive to the global cues, were found in both granular and dysgranular RSC. The  
21 current fMRI resolution means that it is not possible to discriminate substructures of  
22 RSC, however an intriguing hypothesis from the current data is that there is greater  
23 structure in the arrangement of orientations for cells coding for LHD relative to GHD.  
24 This coarse organisation would mean that, at the voxel-level, a distinct signal would  
25 be evident for each LHD, resulting in above-chance decoding (Drucker & Aguirre,

1 2009; Epstein & Morgan, 2012). Combined with the univariate results of Shine et al.  
2 (2016), the RSC contains information regarding both HD reference frames, and mirrors  
3 the rodent data in which neurons in the RSC have been shown to encode diverse  
4 spatial properties, such as left versus right hand turns in a maze, as well as the  
5 animal's position on a track in both ego- and allocentric coordinates (Alexander &  
6 Nitz, 2015; Nitz, 2012).

7 The successful decoding of GHD and LHD in V1, despite the stimuli being  
8 balanced in terms of stimulus category, adds to the growing evidence of the  
9 contribution of primary visual regions to spatial processing in rodents (e.g., Pakan et  
10 al., 2018; Saleem et al., 2018) and humans (Koch et al., 2020). Importantly, however,  
11 our learning and test phases were separate, meaning that visual information (e.g., a  
12 visible global landmark in the arena) was less likely to play a role in our findings. One  
13 possible explanation is that the decoding of GHD in V1 reflects representations of the  
14 associated global landmark (e.g., bridge, mountain). This explanation, however, does  
15 not accommodate the findings for LHD, in which both stimulus category and global  
16 landmark were balanced. The decoding of GHD in V1 could reflect reinstatement of  
17 visual information associated with a given facing direction, driven by, for example, the  
18 multimodal visuo-vestibular representation of GHD in the thalamus. This explanation  
19 is perhaps unlikely, however, given that spatial signals in the rodent V1 persist even  
20 in the absence of modulation of thalamic input from the lateral geniculate nucleus  
21 (Diamanti et al., 2021). Future studies that acquire high-resolution temporal  
22 information may help to shed light on the origin of this HD signal in V1, but it seems  
23 apparent from several studies that V1 plays a more prominent role in spatial coding  
24 than previously anticipated.



1 In addition to the ROI data, we observed at the whole brain level via searchlight a  
2 GHD signal in the precuneus, which supports the notion that this parietal region  
3 contains world-centred coordinates (Snyder, Grieve, Brotchie, & Andersen, 1998;  
4 Wilber, Clark, Forster, Tatsuno, & McNaughton, 2014). Furthermore, we found a  
5 significant cluster in the posterior medial cortex, posterior to the RSC, in a region  
6 analogous to the retrosplenial complex where coding of HD has been reported  
7 previously (Baumann & Mattingley, 2010; Vass & Epstein, 2013). The relative  
8 frequency of the effects in these posterior medial regions, not limited to anatomical  
9 RSC, highlights the importance of these regions in spatial coding. In terms of clinical  
10 applications, recent studies have shown that the posterior medial cortex is an early  
11 target for amyloid deposition (Maass et al., 2019) and shows altered function in young  
12 adults at risk of Alzheimer's Disease (Shine, Hodgetts, Postans, Lawrence, & Graham,  
13 2015). That these regions are impacted in the early stages of Alzheimer's and appear  
14 involved in GHD coding may help to explain spatial disorientation observed in the  
15 disease (Lester, Moffat, Wiener, Barnes, & Wolbers, 2017).

16 There are limitations to the conclusions that can be made on the basis of these  
17 data. First, this study comprised the reanalysis of data with a small sample size.  
18 Despite using non-parametric analysis methods to lessen the impact of the sample  
19 size, it would be important to see the results replicated in a larger sample. The  
20 findings, however, appear consistent across univariate and multivariate analysis  
21 methods. Second, given that participants were trained to a high-performance level  
22 before entering the scanner, there was little variability in the data to correlate  
23 behavioural performance with decoding accuracy, nor did we collect data regarding  
24 training performance. This means we cannot comment on the emergence of HD  
25 representations, or how a landmark's perceived stability correlates with fMRI

1 measures of HD coding. Finally, participants were trained to focus on GHD meaning  
2 that our results are not sensitive to regions in which the HD activity is modulated by  
3 attentional demands.

4 To summarize, our multivariate reanalysis of Shine et al. (2016) provides greater  
5 insight into the neural underpinnings of coding global and local HD reference frames  
6 in the human brain. Our findings support recent rodent and human fMRI data and  
7 point to potential organisational principles of the HD signal particularly with regards  
8 to LHD.

9

10

11

12

13

14

15

16

17

18

19

20

21

22

23

24

25

## 1 **References**

2

3 Alexander, A. S., & Nitz, D. A. (2015). Retrosplenial cortex maps the conjunction of  
4 internal and external spaces. *Nature Neuroscience*, *18*(8), 1143–1151.

5 <https://doi.org/10.1038/nn.4058>

6 Andersson, J. L. R., Jenkinson, M., & Smith, S. (2007). *Non-linear registration aka*  
7 *Spatial normalisation FMRIB Technial Report TR07JA2*.

8 Baumann, O., & Mattingley, J. B. (2010). Medial Parietal Cortex Encodes Perceived  
9 Heading Direction in Humans. *Journal of Neuroscience*, *30*(39), 12897–12901.

10 <https://doi.org/10.1523/JNEUROSCI.3077-10.2010>

11 Benjamini, Y., & Liu, W. (1999). A step-down multiple hypotheses testing procedure  
12 that controls the false discovery rate under independence. *Journal of Statistical*  
13 *Planning and Inference*, *82*(1–2), 163–170. [https://doi.org/10.1016/S0378-](https://doi.org/10.1016/S0378-3758(99)00040-3)  
14 [3758\(99\)00040-3](https://doi.org/10.1016/S0378-3758(99)00040-3)

15 Brett, M., Markiewicz, C. J., Hanke, M., Côté, M.-A., Cipollini, B., McCarthy, P., ...  
16 freec84. (2019). nipy/nibabel: 2.5.1. <https://doi.org/10.5281/ZENODO.3458246>

17 Clark, B. J., Bassett, J. P., Wang, S. S., & Taube, J. S. (2010). Impaired Head  
18 Direction Cell Representation in the Anterodorsal Thalamus after Lesions of the  
19 Retrosplenial Cortex. *Journal of Neuroscience*, *30*(15), 5289–5302.

20 <https://doi.org/10.1523/JNEUROSCI.3380-09.2010>

21 Clark, Benjamin J., & Harvey, R. E. (2016). Do the anterior and lateral thalamic nuclei  
22 make distinct contributions to spatial representation and memory?

23 *Neurobiology of Learning and Memory*, *133*(June), 69–78.

24 <https://doi.org/10.1016/j.nlm.2016.06.002>

25 Diamanti, E. M., Reddy, C. B., Schröder, S., Muzzu, T., Harris, K. D., Saleem, A. B.,

- 1           & Carandini, M. (2021). Spatial modulation of visual responses arises in cortex  
2           with active navigation. *ELife*, *10*, 1–15. <https://doi.org/10.7554/eLife.63705>
- 3       Drucker, D. M., & Aguirre, G. K. (2009). Different spatial scales of shape similarity  
4           representation in lateral and ventral LOC. *Cerebral Cortex*, *19*(10), 2269–2280.  
5           <https://doi.org/10.1093/cercor/bhn244>
- 6       Epstein, R. A., & Morgan, L. K. (2012). Neural responses to visual scenes reveals  
7           inconsistencies between fMRI adaptation and multivoxel pattern analysis.  
8           *Neuropsychologia*, *50*(4), 530–543.  
9           <https://doi.org/10.1016/j.neuropsychologia.2011.09.042>
- 10      Etzel, J. A., Zacks, J. M., & Braver, T. S. (2013). Searchlight analysis: promise,  
11           pitfalls, and potential. *NeuroImage*, *78*, 261–269.  
12           <https://doi.org/10.1016/j.neuroimage.2013.03.041>
- 13      Haggerty, D. C., & Ji, D. (2015). Activities of visual cortical and hippocampal neurons  
14           co-fluctuate in freely moving rats during spatial behavior. *ELife*, *4*, e08902.  
15           <https://doi.org/10.7554/eLife.08902>
- 16      Harland, B., Grieves, R. M., Bett, D., Stentiford, R., Wood, E. R., & Dudchenko, P. A.  
17           (2017). Lesions of the Head Direction Cell System Increase Hippocampal Place  
18           Field Repetition. *Current Biology*, *27*(17), 2706-2712.e2.  
19           <https://doi.org/10.1016/J.CUB.2017.07.071>
- 20      Harris, C. R., Millman, K. J., van der Walt, S. J., Gommers, R., Virtanen, P.,  
21           Cournapeau, D., ... Oliphant, T. E. (2020, September 17). Array programming  
22           with NumPy. *Nature*. Nature Research. [https://doi.org/10.1038/s41586-020-](https://doi.org/10.1038/s41586-020-2649-2)  
23           2649-2
- 24      Jacob, P. Y., Casali, G., Spieser, L., Page, H., Overington, D., & Jeffery, K. (2017).  
25           An independent, landmark-dominated head-direction signal in dysgranular

- 1 retrosplenial cortex. *Nature Neuroscience*, 20(2), 173–175.
- 2 <https://doi.org/10.1038/nn.4465>
- 3 Jeffery, K. J., Page, H. J. I., & Stringer, S. M. (2016). Optimal cue combination and  
4 landmark-stability learning in the head direction system. *Journal of Physiology*,  
5 594(22), 6527–6534. <https://doi.org/10.1113/JP272945>
- 6 Jenkinson, M., Beckmann, C. F., Behrens, T. E. J., Woolrich, M. W., & Smith, S. M.  
7 (2012). FSL. *NeuroImage*, 62(2), 782–790.  
8 <https://doi.org/10.1016/j.neuroimage.2011.09.015>
- 9 Kim, S. S., Rouault, H., Druckmann, S., & Jayaraman, V. (2017). Ring attractor  
10 dynamics in the *Drosophila* central brain. *Science*, 356(6340), 849–853.  
11 <https://doi.org/10.1126/science.aal4835>
- 12 Knierim, J. J., & Zhang, K. (2012). Attractor dynamics of spatially correlated neural  
13 activity in the limbic system. *Annual Review of Neuroscience*, 35, 267–285.  
14 <https://doi.org/10.1146/annurev-neuro-062111-150351>
- 15 Koch, C., Li, S.-C., Polk, T. A., & Schuck, N. W. (2020). Effects of aging on encoding  
16 of walking direction in the human brain. *Neuropsychologia*, 141, 107379.  
17 <https://doi.org/10.1016/j.neuropsychologia.2020.107379>
- 18 Krauth, A., Blanc, R., Poveda, A., Jeanmonod, D., Morel, A., & Székely, G. (2010). A  
19 mean three-dimensional atlas of the human thalamus: Generation from multiple  
20 histological data. *NeuroImage*, 49(3), 2053–2062.  
21 <https://doi.org/10.1016/j.neuroimage.2009.10.042>
- 22 Kriegeskorte, N., Goebel, R., & Bandettini, P. (2006). Information-based functional  
23 brain mapping. *Proceedings of the National Academy of Sciences of the United*  
24 *States of America*, 103(10), 3863–3868.  
25 <https://doi.org/10.1073/pnas.0600244103>

- 1 Lester, A. W., Moffat, S. D., Wiener, J. M., Barnes, C. A., & Wolbers, T. (2017). The  
2 Aging Navigational System. *Neuron*, *95*(5), 1019–1035.  
3 <https://doi.org/10.1016/j.neuron.2017.06.037>
- 4 Maass, A., Berron, D., Harrison, T. M., Adams, J. N., La Joie, R., Baker, S., ...  
5 Jagust, W. J. (2019). Alzheimer’s pathology targets distinct memory networks in  
6 the ageing brain. *Brain*, *142*(8), 2492–2509.  
7 <https://doi.org/10.1093/brain/awz154>
- 8 Marchette, S. A., Vass, L. K., Ryan, J., & Epstein, R. A. (2014). Anchoring the neural  
9 compass: Coding of local spatial reference frames in human medial parietal  
10 lobe. *Nature Neuroscience*, *17*(11), 1598–1606. <https://doi.org/10.1038/nn.3834>
- 11 McKinney, W. (2010). Data Structures for Statistical Computing in Python. In  
12 *Proceedings of the 9th Python in Science Conference* (pp. 56–61). SciPy.  
13 <https://doi.org/10.25080/majora-92bf1922-00a>
- 14 Mou, W., & McNamara, T. P. (2002). Intrinsic Frames of Reference in Spatial  
15 Memory. *Journal of Experimental Psychology: Learning Memory and Cognition*,  
16 *28*(1), 162–170. <https://doi.org/10.1037/0278-7393.28.1.162>
- 17 Mou, W., McNamara, T. P., & Zhang, L. (2013). Global frames of reference organize  
18 configural knowledge of paths. *Cognition*, *129*(1), 180–193.  
19 <https://doi.org/10.1016/j.cognition.2013.06.015>
- 20 Nitz, D. A. (2012). Spaces within spaces: Rat parietal cortex neurons register  
21 position across three reference frames. *Nature Neuroscience*, *15*(10), 1365–  
22 1367. <https://doi.org/10.1038/nn.3213>
- 23 Page, H. J. I., & Jeffery, K. J. (2018). Landmark-Based Updating of the Head  
24 Direction System by Retrosplenial Cortex: A Computational Model. *Frontiers in*  
25 *Cellular Neuroscience*, *12*, 191. <https://doi.org/10.3389/fncel.2018.00191>

- 1 Pakan, J. M. P., Currie, S. P., Fischer, L., & Rochefort, N. L. (2018). The Impact of  
2 Visual Cues, Reward, and Motor Feedback on the Representation of  
3 Behaviorally Relevant Spatial Locations in Primary Visual Cortex. *Cell Reports*,  
4 24(10), 2521–2528. <https://doi.org/10.1016/j.celrep.2018.08.010>
- 5 Pedregosa, F., Varoquaux, G., Gramfort, A., Michel, V., Thirion, B., Grisel, O., ...  
6 Duchesnay, É. (2012). Scikit-learn: Machine Learning in Python. *Journal of*  
7 *Machine Learning Research*, 12(Oct), 2825–2830.  
8 <https://doi.org/10.1007/s13398-014-0173-7.2>
- 9 Pisokas, I., Heinze, S., & Webb, B. (2020). The head direction circuit of two insect  
10 species. *ELife*, 9, e53985. <https://doi.org/10.7554/eLife.53985>
- 11 Saleem, A. B., Diamanti, E. M., Fournier, J., Harris, K. D., & Carandini, M. (2018).  
12 Coherent encoding of subjective spatial position in visual cortex and  
13 hippocampus. *Nature*, 562(7725), 124–127. [https://doi.org/10.1038/s41586-](https://doi.org/10.1038/s41586-018-0516-1)  
14 [018-0516-1](https://doi.org/10.1038/s41586-018-0516-1)
- 15 Shine, J. P., Hodgetts, C. J., Postans, M., Lawrence, A. D., & Graham, K. S. (2015).  
16 APOE-ε4 selectively modulates posteromedial cortex activity during scene  
17 perception and short-term memory in young healthy adults. *Scientific Reports*,  
18 5(1), 16322. <https://doi.org/10.1038/srep16322>
- 19 Shine, Jonathan P., Valdés-Herrera, J. P., Hegarty, M., & Wolbers, T. (2016). The  
20 Human Retrosplenial Cortex and Thalamus Code Head Direction in a Global  
21 Reference Frame. *The Journal of Neuroscience*, 36(24), 6371–6381.  
22 <https://doi.org/10.1523/JNEUROSCI.1268-15.2016>
- 23 Singmann, H., Bolker, B., Westfall, J., & Aust, F. (2018). afex': analysis of factorial  
24 experiments. R package.
- 25 Smith, S. M., Jenkinson, M., Woolrich, M. W., Beckmann, C. F., Behrens, T. E. J.,

- 1       Johansen-Berg, H., ... Matthews, P. M. (2004). Advances in functional and  
2       structural MR image analysis and implementation as FSL. *NeuroImage*,  
3       23(SUPPL. 1), S208–S219. <https://doi.org/10.1016/j.neuroimage.2004.07.051>
- 4       Snyder, L. H., Grieve, K. L., Brotchie, P., & Andersen, R. a. (1998). Space in Parietal  
5       Cortex. *Nature*, 394(August), 887–891. <https://doi.org/10.1038/29777>
- 6       Stangl, M., Wolbers, T., & Shine, J. P. (2019). Population-Level Analysis of Human  
7       Grid Cell Activation. In S. Pollmann (Ed.) (pp. 257–279). New York, NY: Springer  
8       US. [https://doi.org/10.1007/7657\\_2019\\_27](https://doi.org/10.1007/7657_2019_27)
- 9       Stelzer, J., Chen, Y., & Turner, R. (2013). Statistical inference and multiple testing  
10       correction in classification-based multi-voxel pattern analysis (MVPA): Random  
11       permutations and cluster size control. *NeuroImage*, 65, 69–82.  
12       <https://doi.org/10.1016/j.neuroimage.2012.09.063>
- 13       Taube, J. S. (2007). The Head Direction Signal: Origins and Sensory-Motor  
14       Integration. *Annual Review of Neuroscience*, 30(1), 181–207.  
15       <https://doi.org/10.1146/annurev.neuro.29.051605.112854>
- 16       Varoquaux, G., Raamana, P. R., Engemann, D. A., Hoyos-Idrobo, A., Schwartz, Y., &  
17       Thirion, B. (2017). Assessing and tuning brain decoders: Cross-validation,  
18       caveats, and guidelines. *NeuroImage*, 145, 166–179.  
19       <https://doi.org/10.1016/j.neuroimage.2016.10.038>
- 20       Vass, L. K., & Epstein, R. A. (2013). Abstract Representations of Location and Facing  
21       Direction in the Human Brain. *Journal of Neuroscience*, 33(14), 6133–6142.  
22       <https://doi.org/10.1523/JNEUROSCI.3873-12.2013>
- 23       Waskom, M., Botvinnik, O., drewokane, Hobson, P., David, Halchenko, Y., ... Lee,  
24       A. (2016). seaborn: v0.7.1 (June 2016). <https://doi.org/10.5281/ZENODO.54844>
- 25       Wilber, A. A., Clark, B. J., Forster, T. C., Tatsuno, M., & McNaughton, B. L. (2014).



1 Interaction of Egocentric and World-Centered Reference Frames in the Rat

2 Posterior Parietal Cortex. *Journal of Neuroscience*, 34(16), 5431–5446.

3 <https://doi.org/10.1523/JNEUROSCI.0511-14.2014>

4 Winter, S. S., Clark, B. J., & Taube, J. S. (2015). Disruption of the head direction cell

5 network impairs the parahippocampal grid cell signal. *Science*, 347(6224), 870–

6 874. <https://doi.org/10.1126/science.1259591>

7 Zhang, K. (1996). Representation of spatial orientation by the intrinsic dynamics of

8 the head-direction cell ensemble: A theory. *Journal of Neuroscience*, 16(6),

9 2112–2126. <https://doi.org/10.1523/jneurosci.16-06-02112.1996>

10

11

12

13

14

15

16

17

18

19

20

21

22

23

24

25
